# Supplementary material
Source: PubMed Central journal article supplement (PMC6650343)
Supplement: NIHMS1023422-supplement-sup.pdf [file NIHMS1023422-supplement-sup.pdf]

# Emerging epigenetic-modulating therapies in lymphoma

---

*David Sermer, Laura Pasqualucci, Hans-Guido Wendel, Ari Melnick and Anas Younes*

<https://doi.org/10.1038/s41571-019-0190-8>

**Supplementary Table 1. Summary of ongoing clinical trials of HDAC inhibitors**

| <b>Epigenetic agent</b> | <b>Combination</b>    | <b>Lymphoma subtype</b>    | <b>Trial design</b> | <b>Clinicaltrials.gov identifier</b> | <b>Year opened</b> |
|-------------------------|-----------------------|----------------------------|---------------------|--------------------------------------|--------------------|
| Entinostat              | Pembrolizumab         | HL, FL                     | Phase II            | NCT03179930                          | 2017               |
| Vorinostat              | Pembrolizumab         | HL, FL, DLBCL              | Phase I             | NCT03150329                          | 2017               |
| CUDC-907                | none                  | DLBCL                      | Phase II            | NCT02674750                          | 2016               |
| CUDC-907                | none                  | Paediatric lymphomas       | Phase I             | NCT02909777                          | 2016               |
| Resminostat             | none                  | MF                         | Phase II            | NCT02953301                          | 2016               |
| Vorinostat              | Lenalidomide+HDT/ASCT | Non-GCB DLBCL              | Phase I             | NCT02589145                          | 2015               |
| ACY-1215                | none                  | NHL                        | Phase Ib/II         | NCT02091063                          | 2014               |
| Belinostat              | Carfilzomib           | NHL                        | Phase I             | NCT02142530                          | 2014               |
| Romidepsin              | Radiation + Poly ICLC | CTCL                       | Phase I             | NCT02061449                          | 2014               |
| Romidepsin              | GemOX-dex             | Aggressive NHL             | Phase I             | NCT02181218                          | 2014               |
| Romidepsin              | Doxil                 | CTCL                       | Phase I             | NCT01902225                          | 2013               |
| Romidepsin              | Alisertib             | NHL                        | Phase I             | NCT01897012                          | 2013               |
| Romidepsin              | GDP                   | DLBCL, PTCL                | Phase I             | NCT01846390                          | 2013               |
| Belinostat              | Yttrium Y-90          | NHL                        | Phase II            | NCT01686165                          | 2012               |
| Vorinostat              | R-EPOCH               | HIV-related aggressive NHL | Phase I/II          | NCT01193842                          | 2010               |
| Vorinostat              | Bortezomib            | DLBCL, MCL                 | Phase II            | NCT00703664                          | 2008               |

HL, Hodgkin lymphoma; FL, follicular lymphoma; DLBCL, diffuse large B-cell lymphoma; MF, mycosis fungoides; HDT/ASCT, high-dose chemotherapy/autologous stem cell transplant; GCB, germinal center B-cell; NHL, non-Hodgkin lymphoma; CTCL, cutaneous T-cell lymphoma; PTCL, peripheral T-cell lymphoma; MCL, mantle cell lymphoma

**Supplementary Table 2. Summary of ongoing clinical trials of PRMT5 and IDH inhibitors**

| <b>Epigenetic agent</b> | <b>Class</b>     | <b>Lymphoma subtype</b>     | <b>Trial design</b> | <b>Clinicaltrials.gov identifier</b> | <b>Year opened</b> |
|-------------------------|------------------|-----------------------------|---------------------|--------------------------------------|--------------------|
| GSK3326595              | PRMT5 inhibitor  | NHL                         | Phase I             | NCT02783300                          | 2016               |
| AG-881                  | IDH1/2 inhibitor | Haematological malignancies | Phase I             | NCT02492737                          | 2015               |
| AG-221                  | IDH2 inhibitor   | AITCL                       | Phase I/II          | NCT02273739                          | 2014               |
| AG-120                  | IDH1 inhibitor   | Haematological malignancies | Phase I             | NCT02074839                          | 2014               |
| AG-221                  | IDH2 inhibitor   | Haematological malignancies | Phase I/II          | NCT01915498                          | 2013               |

NHL, non-Hodgkin lymphoma; AITL, angioimmunoblastic T-cell lymphoma
